# Supplementary material for: Impact of Tacrolimus Daily Dose Limitation in Renal Transplant Recipients Expressing CYP3A5: A Retrospective Study
Source: MDPI journal article supplement (doi:10.3390/jpm11101002), 2021-10-02
Supplement: s1 [file s1]

**Supplemental Table S1. Histological lesions on the last kidney biopsy before graft loss, according to CYP3A5 genotype.**

|                                      | CYP3A *3/*3 (n=74) | CYP3A *3/- (n=13) | p-value |
|--------------------------------------|--------------------|-------------------|---------|
| Chronic ABMR                         | 8 (10.8%)          | 1 (7.69%)         | 1.000   |
| Acute ABMR                           | 11 (14.9%)         | 1 (7.69%)         | 0.684   |
| Acute TCMR                           | 16 (21.6%)         | 1 (7.69%)         | 0.449   |
| Chronic TCMR                         | 3 (4.05%)          | 0                 | 1.000   |
| Borderline rejection                 | 13 (17.6%)         | 0                 | 0.202   |
| Acute tubular necrosis               | 29 (39.2%)         | 6 (46.2%)         | 0.868   |
| Pyelonephritis                       | 4 (5.41%)          | 0                 | 1.000   |
| Recurrence of primary kidney disease | 4 (5.41%)          | 2 (15.4%)         | 0.218   |
| Tacrolimus chronic nephrotoxicity    | 11 (14.9%)         | 3 (23.1%)         | 0.432   |
| BK virus nephropathy                 | 8 (10.8%)          | 0                 | 0.600   |
| Thrombotic microangiopathy           | 10 (13.5%)         | 5 (38.5%)         | 0.043   |
| Donor specific lesions               | 34 (45.9%)         | 4 (30.8%)         | 0.475   |
| <i>De novo</i> glomerulonephritis    | 0                  | 2 (15.4%)         | 0.021   |

Abbreviations : ABMR = Antibody Mediated Rejection, TCMR = T cell Mediated Rejection

**Supplemental Table S2. Linear mixed model for Tacrolimus daily dose / body weight (mg/kg/day) according to CYP3A5 expression from 1 year post transplantation.**

|                                      | Association with Tac daily dose / body weight<br>(baseline effect) |                  |         | Association with Tac daily dose / body weight<br>evolution<br>(slope effect) |                      |         |
|--------------------------------------|--------------------------------------------------------------------|------------------|---------|------------------------------------------------------------------------------|----------------------|---------|
|                                      | Coefficients                                                       | CI95%            | p-value | Coefficients                                                                 | CI95%                | p-value |
| Referential value                    | 0.0656                                                             | (0.0629; 0.0682) | < 0.01  | - 0.0027                                                                     | (- 0.0031; - 0.0025) | < 0.01  |
| CYP3A5 *1/-<br>(versus CYP3A5 *3/*3) | 0.0342                                                             | (0.0280; 0.0404) | < 0.01  | - 0.0006                                                                     | (-0.0015; 0.0003)    | 0.17    |

Time is expressed as a continuous variable in years.

The mean Tacrolimus daily dose / body weight (mg/kg/day) for the estimated model is calculated as: Tacrolimus daily dose / body weight = 0.0656 + 0.0342\*[CYP3A5 \*1/-] + (- 0.0027 - 0.0006\*[CYP3A5 \*1/-])\*time (in years) with 1 if CYP3A5 \*1/- and 0 otherwise.

Abbreviations: CI95% = Confidence Interval 95%; Tac = Tacrolimus

**Supplemental Table S3. Linear mixed model for Tacrolimus C0 over time according to CYP3A5 genotype from 1 year post transplantation.**

|                                      | Association with Tacrolimus C0<br>(baseline effect) |                 |         | Association with Tacrolimus C0 evolution<br>(slope effect) |                |         |
|--------------------------------------|-----------------------------------------------------|-----------------|---------|------------------------------------------------------------|----------------|---------|
|                                      | Coefficients                                        | CI95%           | p-value | Coefficients                                               | CI95%          | p-value |
| Referential value                    | 8.36                                                | (8.07; 8.65)    | < 0.01  | -1.18                                                      | (-1.32; -1.03) | < 0.01  |
| CYP3A5 *1/-<br>(versus CYP3A5 *3/*3) | -1.36                                               | (-2.03 ; -0.69) | < 0.01  | 0.13                                                       | (-0.21 ; 0.48) | 0.46    |

Time is expressed as a continuous variable in years. Square root time is included to account for a changing effect on time. Thus, estimated Tacrolimus C0 evolution over time is for square root time unit. The mean Tacrolimus daily dose / body weight (mg/kg/day) for the estimated model is calculated as: Tacrolimus daily dose / body weight = 8.36 - 1.36\*[CYP3A5 \*1/-] + (- 1.18+0.13\*[CYP3A5 \*1/-])\*sqr (time) with 1 if CYP3A5 \*1/- and 0 otherwise.

Abbreviations: C0 = Tacrolimus blood through concentration, CI95% = Confidence Interval 95%; Tac = Tacrolimus

**Supplemental Table S4. Linear mixed model for C0 / Tacrolimus daily dose estimation over time according to CYP3A5 expression from 1 year post transplantation.**

|                                      | Association with the C0 / daily dose<br>(baseline effect) |                  |         | Association with the C0 / daily dose evolution<br>(slope effect) |                |         |
|--------------------------------------|-----------------------------------------------------------|------------------|---------|------------------------------------------------------------------|----------------|---------|
|                                      | Coefficients                                              | CI95%            | p-value | Coefficients                                                     | CI95%          | p-value |
| Referential value                    | 2.00                                                      | (1.90; 2.09)     | < 0.01  | -0.01                                                            | (-0.03; 0.01)  | 0.22    |
| CYP3A5 *1/-<br>(versus CYP3A5 *3/*3) | - 1.01                                                    | (- 1.23; - 0.78) | < 0.01  | 0.01                                                             | (- 0.04; 0.05) | 0.81    |

Time is expressed as a continuous variable in years. The mean C0 / daily dose for the estimated model is calculated as: C0/daily dose(time) = 2.00 - 1.01\*[CYP3A5 \*1/-] + (-0.01 + 0.01\*[CYP3A5 \*1/-])\*time with 1 if CYP3A5 \*1/- and 0 otherwise. Abbreviations: C0 = Tacrolimus blood through concentration, CI95% = Confidence Interval 95%.

**Supplemental Table S5. Multivariate Cox model for death censored graft survival.**

|                                                         | HR    | CI95%         | p-value |
|---------------------------------------------------------|-------|---------------|---------|
| <i>CYP3A5</i> *1/- ( <i>versus</i> <i>CYP3A5</i> *3/*3) | 0.73  | [0.43; 1.23]  | 0.23    |
| Recipient age (per 10 years)                            | 0.99  | [0.80; 1.21]  | 0.89    |
| Donor age (per 10 years)                                | 1.14  | [0.94; 1.38]  | 0.17    |
| Retransplantation (yes <i>versus</i> no)                | 0.99  | [0.58; 1.67]  | 0.96    |
| Time spent in dialysis (per 1 year)                     | 1.05  | [1.02; 1.08]  | < 0.01  |
| Donor vital status                                      |       |               |         |
| - Living donor                                          | Ref.  |               |         |
| - Non cerebrovascular donor death                       | 3.62  | [0.80; 16.38] | 0.09    |
| - Cerebrovascular donor death                           | 5.36  | [1.18; 24.23] | 0.03    |
| - Donor after cardiac death                             | 12.56 | [2.50; 63.13] | < 0.01  |
| Cold ischemia time (per 10 hours)                       | 1.06  | [0.79; 1.44]  | 0.68    |
| Occurrence of BPAR (yes <i>versus</i> no)               | 4.18  | [2.81; 6.22]  | < 0.01  |

Abbreviations: HR = Hazard Ratio, CI95% = Confidence interval 95%, BPAR = Biopsy Proven Acute Rejection. Occurrence of BPAR was a time dependent covariate. 22 observations were deleted due to missingness

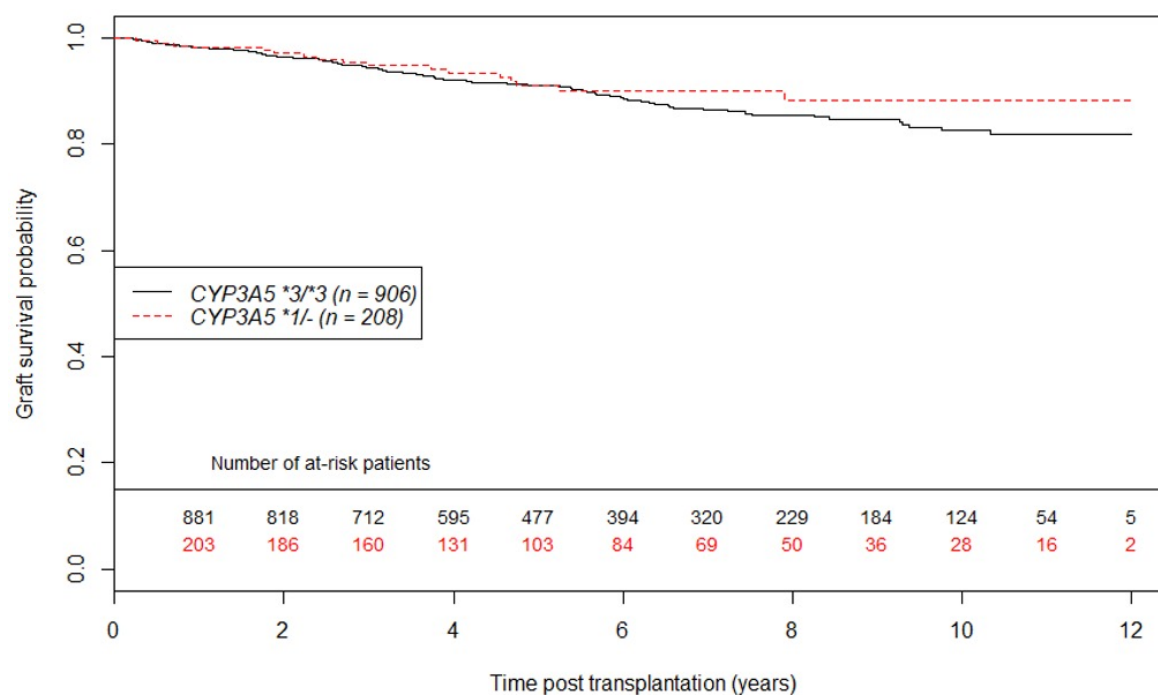

**Supplemental Figure S1: Unadjusted curves of death censored graft survival using the Kaplan Meier estimator according to CYP3A5 genotype (n = 1114 patients).**
